# Supplementary material for: Chemical composition of Luffa aegyptiaca Mill., Agave durangensis Gentry and Pennisetum sp
Source: PeerJ. 2021 Jan 22;9:e10626. doi: 10.7717/peerj.10626 (PMC7831367; doi:10.7717/peerj.10626)
Supplement: Supplemental Information 1 [file peerj-09-10626-s001.xlsx]

## Sheet: % Humidity for extracrtives
% Humidity to calculate the materials dry weigth for determination of extractives
Agave durangensis bagasse							%H=((WW-DW)/WW)*100
Box (g)	Cover (g)	Wet weight (g)	Box + cover + WW (g)	Dry weight (g)	%H		Where:
44.3759	36.1155	1.0225	81.4535	0.9621	5.90709
44.3422	47.0318	1.0244	92.3416	0.9676	5.54471		%H = Humidity percentage
36.277	36.77	1.007	73.995	0.948	5.85899		WW = Wet weight
38.4896	37.6533	1.0262	77.1149	0.972	5.28162		DW = Dry weight
				Overall	5.6481
Luffa aegyptiaca fruit
Box (g)	Cover (g)	Wet weight (g)	Box + cover + WW (g)	Dry weight (g)	%H
44.6476	36.1155	1.0027	81.715	0.9519	5.06632
44.376	47.0318	1.0019	92.3657	0.9579	4.39166
39.545	36.77	1.0034	77.258	0.943	6.01953
				Overall	5.15917
Pennisetum sp. leaves
Box (g)	Cover (g)	Wet weight (g)	Box + cover + WW (g)	Dry weight (g)	%H
36.8447	36.1155	1.0091	73.91	0.9498	5.87652
47.0309	47.0318	1.0289	95.0233	0.9606	6.63816
				Overall	6.25734
Pennisetum sp. plant
Box (g)	Cover (g)	Wet weight (g)	Box + cover + WW (g)	Dry weight (g)	%H
45.7215	44.7658	1.0164	91.4082	0.9209	9.39591
36.84	37.7755	1.0056	75.5311	0.9156	8.94988
				Overall	9.17289
Pennisetum sp. stem
Box (g)	Cover (g)	Wet weight (g)	Box + cover + WW (g)	Dry weight (g)	%H
36.845	37.3486	1.0208	75.0161	0.8225	19.4259
47.0307	47.3359	1.008	95.1957	0.8291	17.748
					18.587

## Sheet: Cyclohexane
Cyclohexane extractives
														Dry weight				Total weight extractives				% Extractives
Agave durangensis bagasse
Sample	Wet Weight (g)	Dry Weight (g)	Cyclohexane I			Cyclohexane II			Total weight extractives (g)	% Extractives				DW=WW*(1-(%H/100))				TWE = EW1 + EW2 + EW3+…+EWn				% Extractives = (TWE/DW)*100
			Initial weight (g)	Final weight (g)	Extractives weight (g)	Initial weight (g)	Final weight (g)	Extractives weight (g)
1	6.0041	5.66498	110.747	111.194	0.4477	95.848	96.0845	0.2365	0.6842	12.0777
2	6.0571	5.71499	99.0027	99.4915	0.4888	106.677	106.928	0.2512	0.74	12.9484				Where:				Where:				Where:
3	6.0212	5.68112	97.7359	98.221	0.4851	99.745	99.975	0.23	0.7151	12.5873
									Mean	12.5378				DW = Dry weight				TWE = Total weight extractives				TWE = Total weight extractives
									Std. Dev.	0.437455				WW = Wet weight				EW = Extractives weight				DW = Dry weight
														% H = Humidity percentage
Luffa aegyptiaca fruit
Sample	Wet Weight (g)	Dry Weight (g)	Cyclohexane			Total weight extractives (g)	% Extractives
			Initial weight (g)	Final weight (g)	Extractives weight (g)
1	6.0068	5.6969	95.1491	95.3147	0.1656	0.1656	2.90684
2	6.0071	5.69718	96.6923	96.8683	0.176	0.176	3.08925
3	6.0308	5.71966	93.0652	93.2159	0.1507	0.1507	2.63477
						Mean	2.87695
						Std. Dev.	0.228707
Pennisetum sp. leaves
Sample	Wet Weight (g)	Dry Weight (g)	Cyclohexane I			Cyclohexane II			Cyclohexane III			Cyclohexane IV			Cyclohexane V			Cyclohexane VI			Cyclohexane VII			Total weight extractives (g)	% Extractives
			Initial weight (g)	Final weight (g)	Extractives weight (g)	Initial weight (g)	Final weight (g)	Extractives weight (g)	Initial weight (g)	Final weight (g)	Extractives weight (g)	Initial weight (g)	Final weight (g)	Extractives weight (g)	Initial weight (g)	Final weight (g)	Extractives weight (g)	Initial weight (g)	Final weight (g)	Extractives weight (g)	Initial weight (g)	Final weight (g)	Extractives weight (g)
1	6.0019	5.62634	110.727	111.183	0.4563	95.8425	96.1042	0.2617	110.73	111.022	0.2918	95.8475	96.1466	0.2991	110.722	110.966	0.2444	95.8472	96.2119	0.3647	95.8468	96.1394	0.2926	2.2106	39.2902
2	6.0016	5.62606	98.9876	99.4073	0.4197	106.666	106.869	0.203	98.9861	99.2418	0.2557	106.671	106.987	0.3165	98.9816	99.3366	0.355	106.674	107.098	0.4245	106.672	106.872	0.1997	2.1741	38.6434
3	6.0012	5.62568	96.6224	97.1036	0.4812	99.7332	99.9865	0.2533	96.6855	96.9481	0.2626	99.7396	100.053	0.3137	96.6789	97.0056	0.3267	99.732	100.066	0.334	99.7369	99.8981	0.1612	2.1327	37.9101
																								Mean	38.6145
																								Std. Dev.	0.690521
Pennisetum sp. plant
Sample	Wet Weight (g)	Dry Weight (g)	Cyclohexane I			Cyclohexane II			Cyclohexane III			Total weight extractives (g)	% Extractives
			Initial weight (g)	Final weight (g)	Extractives weight (g)	Initial weight (g)	Final weight (g)	Extractives weight (g)	Initial weight (g)	Final weight (g)	Extractives weight (g)
1	6.007	5.45598	94.001	94.4213	0.4203	107.965	108.353	0.3884	94.0049	94.515	0.5101	1.3188	24.1716
2	6.0101	5.4588	96.6845	97.1017	0.4172	104.081	104.469	0.3876	96.6867	97.1819	0.4952	1.3	23.8148
3	6.012	5.46053	171.129	171.548	0.4183	182.581	182.971	0.3901	171.129	171.622	0.4926	1.301	23.8255
												Mean	23.9373
												Std. Dev.	0.202994
Pennisetum sp. stem
Sample	Wet Weight (g)	Dry Weight (g)	Cyclohexane I			Total weight extractives (g)	% Extractives
			Initial weight (g)	Final weight (g)	Extractives weight (g)
1	6.0008	4.88543	95.1471	95.6039	0.4568	0.4568	9.35025
2	6.0109	4.89366	104.077	104.527	0.4507	0.4507	9.20988
3	6.013	4.89537	182.682	183.196	0.5147	0.5147	10.514
						Mean	9.69139
						Std. Dev.	0.715876

## Sheet: Acetone
Acetone extractives
													Dry weight				Total weight extractives				% Extractives
Agave durangensis bagasse
Sample	Wet Weight (g)	Dry Weight (g)	Acetone I			Acetone II			Total weight extractives (g)	% Extractives			DW=WW*(1-(%H/100))				TWE = EW1 + EW2 + EW3+…+EWn				% Extractives = (TWE/DW)*100
			Initial weight (g)	Final weight (g)	Extractives weight (g)	Initial weight (g)	Final weight (g)	Extractives weight (g)
1	6.0041	5.66498	110.748	110.983	0.2351	95.8466	95.9255	0.0789	0.314	5.54282
2	6.0571	5.71499	99.003	99.1874	0.1844	106.676	106.752	0.0762	0.2606	4.55994			Where:				Where:				Where:
3	6.0212	5.68112	97.7348	97.9619	0.2271	99.7404	99.8083	0.0679	0.295	5.19264
									Mean	5.09847			DW = Dry weight				TWE = Total weight extractives				TWE = Total weight extractives
									Std. Dev.	0.498164			WW = Wet weight				EW = Extractives weight				DW = Dry weight
													% H = Humidity percentage
Luffa aegyptiaca fruit
Sample	Wet Weight (g)	Dry Weight (g)	Acetone			Total weight extractives (g)	% Extractives
			Initial weight (g)	Final weight (g)	Extractives weight (g)
1	6.0068	5.6969	110.726	110.851	0.1251	0.1251	2.19593
2	6.0071	5.69718	95.8538	95.9414	0.0876	0.0876	1.5376
3	6.0308	5.71966	99.7367	99.8727	0.136	0.136	2.37776
						Mean	2.0371
						Std. Dev.	0.442028
Pennisetum sp. leaves
Sample	Wet Weight (g)	Dry Weight (g)	Acetone			Total weight extractives (g)	% Extractives
			Initial weight (g)	Final weight (g)	Extractives weight (g)
1	6.0019	5.62634	95.847	96.04	0.193	0.193	3.43029
2	6.0016	5.62606	106.672	106.861	0.1888	0.1888	3.35581
3	6.0012	5.62568	99.7341	99.9301	0.196	0.196	3.48402
						Mean	3.42338
						Std. Dev.	0.0643834
Pennisetum sp. plant
Sample	Wet Weight (g)	Dry Weight (g)	Acetone I			Acetone II			Total weight extractives (g)	% Extractives
			Initial weight (g)	Final weight (g)	Extractives weight (g)	Initial weight (g)	Final weight (g)	Extractives weight (g)
1	6.007	5.45598	94.0017	94.1223	0.1206	107.964	108.052	0.0882	0.2088	3.82699
2	6.0101	5.4588	96.6906	96.8104	0.1198	104.077	104.154	0.0778	0.1976	3.61984
3	6.012	5.46053	171.124	171.317	0.1931	182.576	182.605	0.0294	0.2225	4.0747
									Mean	3.84051
									Std. Dev.	0.227729
Pennisetum sp. stem
Sample	Wet Weight (g)	Dry Weight (g)	Acetone			Total weight extractives (g)	% Extractives
			Initial weight (g)	Final weight (g)	Extractives weight (g)
1	6.0008	4.88543	93.9918	94.3367	0.3449	0.3449	7.05976
2	6.0109	4.89366	101.929	102.343	0.4143	0.4143	8.46606
3	6.013	4.89537	171.112	171.519	0.4077	0.4077	8.32829
						Mean	7.95137
						Std. Dev.	0.775222

## Sheet: Methanol
Methanol extractives
																Dry weight				Total weight extractives				% Extractives
Agave durangensis bagasse
Sample	Wet Weight (g)	Dry Weight (g)	Methanol I			Methanol II			Methanol III			Total weight extractives (g)	% Extractives			DW=WW*(1-(%H/100))				TWE = EW1 + EW2 + EW3+…+EWn				% Extractives = (TWE/DW)*100
			Initial weight (g)	Final weight (g)	Extractives weight (g)	Initial weight (g)	Final weight (g)	Extractives weight (g)	Initial weight (g)	Final weight (g)	Extractives weight (g)
1	6.0041	5.66498	110.747	111.333	0.5864	95.8478	95.9012	0.0534	110.748	110.781	0.0339	0.6737	11.8924
2	6.0571	5.71499	99.0007	99.5755	0.5748	106.677	106.731	0.0542	99.0007	99.0412	0.0405	0.6695	11.7148			Where:				Where:				Where:
3	6.0212	5.68112	97.736	98.2886	0.5526	99.7428	99.8013	0.0585	97.7366	97.7823	0.0457	0.6568	11.5611
												Mean	11.7228			DW = Dry weight				TWE = Total weight extractives				TWE = Total weight extractives
												Std. Dev.	0.165768			WW = Wet weight				EW = Extractives weight				DW = Dry weight
																% H = Humidity percentage
Luffa aegyptiaca fruit
Sample	Wet Weight (g)	Dry Weight (g)	Methanol I			Methanol II			Total weight extractives (g)	% Extractives
			Initial weight (g)	Final weight (g)	Extractives weight (g)	Initial weight (g)	Final weight (g)	Extractives weight (g)
1	6.0068	5.6969	97.7297	98.0794	0.3497	104.667	104.705	0.0645	0.4142	7.27062
2	6.0071	5.69718	104.076	104.519	0.4435	101.953	102.123	0.0684	0.5119	8.98514
3	6.0308	5.71966	106.674	107.075	0.4016	107.97	108.145	0.067	0.4686	8.19279
									Mean	8.14952
									Std. Dev.	0.858078
Pennisetum sp. leaves
Sample	Wet Weight (g)	Dry Weight (g)	Methanol I			Methanol II			Methanol III			Methanol IV			Methanol V			Total weight extractives (g)	% Extractives
			Initial weight (g)	Final weight (g)	Extractives weight (g)	Initial weight (g)	Final weight (g)	Extractives weight (g)	Initial weight (g)	Final weight (g)	Extractives weight (g)	Initial weight (g)	Final weight (g)	Extractives weight (g)	Initial weight (g)	Final weight (g)	Extractives weight (g)
1	6.0019	5.62634	95.8475	96.4898	0.6423	110.729	110.833	0.1038	95.8522	95.9331	0.0809	95.8471	95.8995	0.0524	95.852	95.9028	0.0508	0.9302	16.5329
2	6.0016	5.62606	106.672	107.312	0.6408	98.9874	99.0937	0.1063	106.673	106.771	0.098	106.671	106.73	0.0593	106.677	106.724	0.047	0.9514	16.9106
3	6.0012	5.62568	99.735	100.357	0.6217	97.7323	97.8451	0.1128	99.7392	99.833	0.0938	99.7341	99.7912	0.0571	99.7374	99.7837	0.0463	0.9317	16.5615
																		Mean	16.6684
																		Std. Dev.	0.210266
Pennisetum sp. plant
Sample	Wet Weight (g)	Dry Weight (g)	Methanol I			Methanol II			Methanol III			Methanol IV			Methanol V			Total weight extractives (g)	% Extractives
			Initial weight (g)	Final weight (g)	Extractives weight (g)	Initial weight (g)	Final weight (g)	Extractives weight (g)	Initial weight (g)	Final weight (g)	Extractives weight (g)	Initial weight (g)	Final weight (g)	Extractives weight (g)	Initial weight (g)	Final weight (g)	Extractives weight (g)
1	6.007	5.45598	107.964	108.632	0.6686	94.0055	94.3505	0.345	107.964	108.185	0.2213	93.9975	94.1228	0.1253	94.0027	94.0409	0.0382	1.3984	25.6306
2	6.0101	5.4588	104.076	104.748	0.6718	96.6973	97.0038	0.3065	104.077	104.151	0.0748	96.6952	96.9345	0.2393	96.6945	96.7502	0.0557	1.3481	24.6959
3	6.012	5.46053	182.574	183.227	0.6534	171.12	171.424	0.3038	182.533	182.677	0.1442	171.118	171.387	0.2688	171.122	171.177	0.0541	1.4243	26.0836
																		Mean	25.47
																		Std. Dev.	0.707628
Pennisetum sp. stem
Sample	Wet Weight (g)	Dry Weight (g)	Methanol I			Methanol II			Methanol III			Methanol IV			Methanol V			Methanol VI			Total weight extractives (g)	% Extractives
			Initial weight (g)	Final weight (g)	Extractives weight (g)	Initial weight (g)	Final weight (g)	Extractives weight (g)	Initial weight (g)	Final weight (g)	Extractives weight (g)	Initial weight (g)	Final weight (g)	Extractives weight (g)	Initial weight (g)	Final weight (g)	Extractives weight (g)	Initial weight (g)	Final weight (g)	Extractives weight (g)
1	6.0008	4.88543	95.15	95.889	0.739	94.0003	94.2808	0.2805	95.1385	95.2289	0.0904	93.9931	94.1754	0.1823	95.1439	95.2645	0.1206	94.9982	95.007	0.0088	1.4216	29.0988
2	6.0109	4.89366	104.081	104.751	0.6697	101.927	102.163	0.2364	104.075	104.189	0.1142	101.925	102.085	0.1596	104.07	104.219	0.1482	101.927	101.935	0.0074	1.3355	27.2904
3	6.013	4.89537	182.569	183.241	0.6718	171.134	171.335	0.2013	182.561	182.668	0.1075	171.111	171.271	0.16	182.571	182.76	0.189	171.12	171.146	0.0264	1.356	27.6997
																					Mean	28.0296
																					Std. Dev.	0.948236

## Sheet: Hot water
Hot water extractives
																			Dry weight				Total weight extractives				% Extractives
Agave durangensis bagasse
Sample	Wet Weight (g)	Dry Weight (g)	Hot water I			Hot water II			Hot water III			Hot water IV			Total weight extractives (g)	% Extractives			DW=WW*(1-(%H/100))				TWE = EW1 + EW2 + EW3+…+EWn				% Extractives = (TWE/DW)*100
			Initial weight (g)	Final weight (g)	Extractives weight (g)	Initial weight (g)	Final weight (g)	Extractives weight (g)	Initial weight (g)	Final weight (g)	Extractives weight (g)	Initial weight (g)	Final weight (g)	Extractives weight (g)
1	6.0041	5.66498	155.075	155.163	0.0882	132.697	132.733	0.0365	147.577	147.605	0.0278	152.339	152.36	0.0211	0.1736	3.06444
2	6.0571	5.71499	138.547	138.644	0.0978	152.395	152.434	0.0385	142.284	142.296	0.012	144.207	144.227	0.0193	0.1676	2.93264			Where:				Where:				Where:
3	6.0212	5.68112	136.245	136.305	0.0603	136.012	136.054	0.0419	140.352	140.406	0.0538	148.955	148.984	0.0284	0.1844	3.24584
															Mean	3.08097			DW = Dry weight				TWE = Total weight extractives				TWE = Total weight extractives
															Std. Dev.	0.157254			WW = Wet weight				EW = Extractives weight				DW = Dry weight
																			% H = Humidity percentage
Luffa aegyptiaca fruit
Sample	Wet Weight (g)	Dry Weight (g)	Hot water			Total weight extractives (g)	% Extractives
			Initial weight (g)	Final weight (g)	Extractives weight (g)
1	6.0068	5.6969	146.124	146.415	0.2902	0.2902	5.094
2	6.0071	5.69718	150.704	151.019	0.3146	0.3146	5.52203
3	6.0308	5.71966	153.903	154.203	0.3002	0.3002	5.24856
						Mean	5.2882
						Std. Dev.	0.216749
Pennisetum sp. leaves
Sample	Wet Weight (g)	Dry Weight (g)	Hot water I			Hot water II			Total weight extractives (g)	% Extractives
			Initial weight (g)	Final weight (g)	Extractives weight (g)	Initial weight (g)	Final weight (g)	Extractives weight (g)
1	6.0019	5.62634	95.8466	95.9877	0.1411	110.729	110.919	0.1894	0.3305	5.87416
2	6.0016	5.62606	106.672	106.818	0.1459	98.9886	99.106	0.1174	0.2633	4.68001
3	6.0012	5.62568	99.7338	99.9604	0.2266	97.7337	97.8346	0.1009	0.3275	5.82151
									Mean	5.45856
									Std. Dev.	0.674759
Pennisetum sp. plant
Sample	Wet Weight (g)	Dry Weight (g)	Hot water I			Hot water II			Total weight extractives (g)	% Extractives
			Initial weight (g)	Final weight (g)	Extractives weight (g)	Initial weight (g)	Final weight (g)	Extractives weight (g)
1	6.007	5.45598	107.963	108.314	0.3512	94.0062	94.0509	0.0447	0.3959	7.25625
2	6.0101	5.4588	104.075	104.438	0.363	96.6906	96.7658	0.0752	0.4382	8.02741
3	6.012	5.46053	182.573	182.875	0.3018	171.121	171.208	0.0872	0.389	7.12386
									Mean	7.46917
									Std. Dev.	0.487956
Pennisetum sp. stem
Sample	Wet Weight (g)	Dry Weight (g)	Hot water I			Hot water II			Total weight extractives (g)	% Extractives
			Initial weight (g)	Final weight (g)	Extractives weight (g)	Initial weight (g)	Final weight (g)	Extractives weight (g)
1	6.0008	4.88543	93.9964	94.3907	0.3943	95.1461	95.1843	0.0382	0.4325	8.85285
2	6.0109	4.89366	101.928	102.415	0.4869	104.078	104.112	0.0346	0.5215	10.6567
3	6.013	4.89537	171.121	171.584	0.4624	182.574	182.605	0.0304	0.4928	10.0667
									Mean	9.85872
									Std. Dev.	0.919706

## Sheet: Total extractives
Total extractives
Extractives	Bagasse of A. gurangensis	Fruit of L. aegyptiaca	Plant of Pennisetum sp.	Leaves of Pennisetum sp.	Stem of Pennisetum sp.
Cyclohexane	12.0777	2.90684	24.1716	39.2902	9.35025
	12.9484	3.08925	23.8148	38.6434	9.20988
	12.5873	2.63477	23.8255	37.9101	10.514
Mean	12.5378	2.87695	23.9373	38.6145	9.69139
St. Dev.	0.437455	0.228707	0.202994	0.690521	0.715876
Acetone	5.54282	2.19593	3.82699	3.43029	7.05976
	4.55994	1.5376	3.61984	3.35581	8.46606
	5.19264	2.37776	4.0747	3.48402	8.32829
Mean	5.09847	2.0371	3.84051	3.42338	7.95137
St. Dev.	0.498164	0.442028	0.227729	0.0643834	0.775222
Methanol	11.8924	7.27062	25.6306	16.5329	29.0988
	11.7148	8.98514	24.6959	16.9106	27.2904
	11.5611	8.19279	26.0836	16.5615	27.6997
Mean	11.7228	8.14952	25.47	16.6684	28.0296
St. Dev.	0.165768	0.858078	0.707628	0.210266	0.948236
Hot water	3.06444	5.094	7.25625	5.87416	8.85285
	2.93264	5.52203	8.02741	4.68001	10.6567
	3.24584	5.24856	7.12386	5.82151	10.0667
Mean	3.08097	5.2882	7.46917	5.45856	9.85872
St. Dev.	0.157254	0.216749	0.487956	0.674759	0.919706
Total Extractives	32.5773	17.4674	60.8854	65.1276	54.3616
	32.1558	19.134	60.1579	63.5898	55.623
	32.5869	18.4539	61.1077	63.7771	56.6086
Mean	32.44	18.3518	60.717	64.1648	55.5311
St. Dev.	0.246185	0.837989	0.496777	0.83901	1.12634

## Sheet: pH
Determination pf pH of the fibers
	Sample	Agave durangensis bagasse	Luffa aegyptiaca fruit	Pennisetum sp. plant	Pennisetum sp. leaves	Pennisetum sp. stem
Start	1	6.57	5.46	6.87	6.87	6.87
	2	6.63	5.22	6.69	6.69	6.69
	3	6.64	5.22	6.8	6.8	6.8
5 minutes	1	6.51	5.24	6.87	6.87	6.87
	2	6.54	5.18	6.74	6.74	6.74
	3	6.59	5.15	6.68	6.68	6.68
4 hours	1	6.23	5.29	6.7	6.7	6.7
	2	6.1	5.09	6.52	6.52	6.52
	3	5.91	5.05	6.43	6.43	6.43
24 hours	1	5.89	4.88	5.92	5.92	5.92
	2	5.45	4.76	5.84	5.84	5.84
	3	5.87	4.81	5.92	5.92	5.92
48 hours	1	5.93	4.68	5.75	5.89	6.18
	2	5.77	4.55	5.87	5.54	6.14
	3	5.83	4.71	5.9	5.68	6.22
	Mean	5.84333	4.64667	5.84	5.70333	6.18
	Std. Dev.	0.080829	0.085049	0.0793725	0.176163	0.04

## Sheet: Ash
Determination of % ash
Agave durangensis bagasse							% Humudity				Dry weight				% Ash
% Humidity
Box (g)	Cover (g)	Wet weight (g)	Box + cover + WW (g)	Dry weight (g)	%H		%H=((WW-DW)/WW)*100				SDW=SWW*(1-(%H/100))				% Ash = (AW/SDW)*100
44.3759	38.5456	1.0225	83.8836	0.9621	5.90709
44.3422	47.2944	1.0244	92.6042	0.9676	5.54471
36.277	36.4384	1.007	73.6634	0.948	5.85899		Where:				Where:				Where:
38.4896	38.1572	1.0262	77.6188	0.972	5.28162
				Mean	5.6481		%H = Humidity percentage				SDW = Sample dry weight				AW = Ash weight
							WW = Wet weight				SWW = Sample wet weight				SDW = Sample dry weight
% Ash							DW = Dry weight				% H = Humidity percentage
Crucible (g)	Sample wet weight (g)	Crucible + Sample wet weight (g)	Sample dry weight (g)	Ash weight (g)	% Ash
19.5353	1.0075	19.6487	0.950595	0.1134	11.9294
17.1592	1.006	17.2804	0.94918	0.1212	12.7689
18.2348	1.0056	18.3606	0.948803	0.1258	13.2588
				Mean	12.6524
				Std. Dev.	0.672344
Luffa aegyptiaca fruit
% Humidity
Box (g)	Cover (g)	Wet weight (g)	Box + cover + WW (g)	Dry weight (g)	%H
44.6476	36.1155	1.0027	81.715	0.9519	5.06632
44.376	47.0318	1.0019	92.3657	0.9579	4.39166
39.545	36.77	1.0034	77.258	0.943	6.01953
				Mean	5.15917
% Ash
Crucible (g)	Sample wet weight (g)	Crucible + Sample wet weight (g)	Sample dry weight (g)	Ash weight (g)	% Ash
17.1736	1.0021	17.2254	0.9504	0.0518	5.45034
18.2611	1.0051	18.3118	0.953245	0.0507	5.31867
19.8251	1.0065	19.874	0.954573	0.0489	5.12271
				Mean	5.29724
				Std. Dev.	0.164862
Pennisetum sp. leaves
% Humidity
Box (g)	Cover (g)	Wet weight (g)	Box + cover + WW (g)	Dry weight (g)	%H
36.8447		1.0091	37.7945	0.9498	5.87652
47.0309		1.0289	47.9915	0.9606	6.63816
				Mean	6.25734
% Ash
Crucible (g)	Sample wet weight (g)	Crucible + Sample wet weight (g)	Sample dry weight (g)	Ash weight (g)	% Ash
17.9114	0.5003	17.976	0.468995	0.0646	13.7741
19.6847	0.5008	19.7488	0.469463	0.0641	13.6539
19.1613	0.5085	19.2247	0.476681	0.0634	13.3003
				Mean	13.5761
				Std. Dev.	0.24632
Pennisetum sp. plant
% Humidity
Box (g)	Cover (g)	Wet weight (g)	Box + cover + WW (g)	Dry weight (g)	%H
45.7215		1.0164	46.6424	0.9209	9.39591
36.84		1.0056	37.7556	0.9156	8.94988
				Mean	9.17289
% Ash
Crucible (g)	Sample wet weight (g)	Crucible + Sample wet weight (g)	Sample dry weight (g)	Ash weight (g)	% Ash
18.5534	0.5009	18.6128	0.454953	0.0594	13.0563
16.7304	0.5005	16.7891	0.45459	0.0587	12.9127
19.5436	0.5013	19.6033	0.455316	0.0597	13.1118
				Mean	13.0269
				Std. Dev.	0.102707
Pennisetum sp. stem
% Humidity
Box (g)	Cover (g)	Wet weight (g)	Box + cover + WW (g)	Dry weight (g)	%H
36.845		1.0208	37.6675	0.8225	19.4259
47.0307		1.008	47.8598	0.8291	17.748
				Mean	18.587
% Ash
Crucible (g)	Sample wet weight (g)	Crucible + Sample wet weight (g)	Sample dry weight (g)	Ash weight (g)	% Ash
16.7214	1.0005	16.8202	0.814537	0.0988	12.1296
18.1556	1.0004	18.2539	0.814456	0.0983	12.0694
18.2092	1.0008	18.3081	0.814782	0.0989	12.1382
				Mean	12.1124
				Std. Dev.	0.0374869

## Sheet: Lignin
Determination of % lignin
													% Humudity				Dry weight
Agave durangensis bagasse													%H = ((WW-DW)/WW)*100				SDW = SWW*(1-(%H/100))
% Lignin
Sample	Sample wet weight (g)	Box (g)	Filter paper (g)	Box + filter paper (g)		Bok + filter paper + sample wet weight (g)		Sample dry weight (g)	Lignin weight (g)	% Lignin
													Where:				Where:
1	1.0026	82.924	1.8066	84.7306		84.8594		0.951842	0.1288	7.42991
2	1.0076	97.4856	1.8277	99.3133		99.4524		0.956589	0.1391	7.98425			%H = Humidity percentage				SDW = Sample dry weight
3	1.0042	97.6394	1.4963	99.1357		99.2651		0.953361	0.1294	7.45263			WW = Wet weight				SWW = Sample wet weight
									Mean	7.62226			DW = Dry weight				% H = Humidity percentage
									Std. Dev.	0.313698
													Extractives and ash content				% Lignin
% Humidity of extractives free materials							Extractives and ash content
Box (g)	Cover (g)	Wet weight (g)	Box + cover + WW (g)	Dry weight (g)	%H		Extractives	32.44					EAC = EC + AC				% Lignin = (LW/SDW)*EAC
18.5188	18.9205	1.011	38.3986	0.9593	5.11375		Ash	12.6524
11.0892	18.79	1.0037	30.8326	0.9534	5.01146
				Mean	5.0626		EAC	54.9076					EAC = Extractives and ash content				Where:
													EC = Extractives content
Luffa aegyptiaca fruit													AC = Ash content				LW = Lignin weight
																	SDW = Sample dry weight
% Lignin
Sample	Sample wet weight (g)	Box (g)	Filter paper (g)	Box + filter paper (g)		Bok + filter paper + sample wet weight (g)		Sample dry weight (g)	Lignin weight (g)	% Lignin							EAC = Extractives and ash content
1	1.0037	100.945	1.8695	102.815		102.879		0.965596	0.0642	5.07638
2	1.0034	91.5826	1.8706	93.4532		93.515		0.965307	0.0618	4.88807
3	1.0012	82.9722	1.9744	84.9466		85.0055		0.96319	0.0589	4.66893
									Mean	4.8778
									Std. Dev.	0.203919
% Humidity of extractives free materials							Extractives and ash content
Box (g)	Cover (g)	Wet weight (g)	Box + cover + WW (g)	Dry weight (g)	%H		Extractives	18.3518
19.0071	18.7908	1.0017	38.7616	0.9637	3.79355		Ash	5.29724
17.8901	19.021	1.0002	37.8733	0.9622	3.79924
				Mean	3.7964		EAC	76.351
Pennisetum sp. leaves
% Lignin
Sample	Sample wet weight (g)	Box (g)	Filter paper (g)	Box + filter paper (g)		Bok + filter paper + sample wet weight (g)		Sample dry weight (g)	Lignin weight (g)	% Lignin
1	1.0011	100.944	1.3631	102.307		102.474		0.944726	0.1665	3.92297
2	1.0005	91.6117	1.7138	93.3255		93.4937		0.94416	0.1682	3.9654
3	1.0016	77.552	1.716	79.268		79.435		0.945198	0.167	3.93279
									Mean	3.94039
									Std. Dev.	0.0222128
% Humidity of extractives free materials							Extractives and ash content
Box (g)	Cover (g)	Wet weight (g)	Box + cover + WW (g)	Dry weight (g)	%H		Extractives	64.1648
44.5467	46.6336	1.0042	92.1278	0.9475	5.64629		Ash	13.5761
44.2738	47.2373	1.0007	92.4556	0.9445	5.61607
				Mean	5.63118		EAC	22.2591
Pennisetum sp. plant
% Lignin
Sample	Sample wet weight (g)	Box (g)	Filter paper (g)	Box + filter paper (g)		Bok + filter paper + sample wet weight (g)		Sample dry weight (g)	Lignin weight (g)	% Lignin
1	1.0036	82.9789	1.9092	84.8881		85.0155		0.952367	0.1274	3.51165
2	1.0021	97.8045	1.822	99.6265		99.7735		0.950944	0.147	4.05797
3	1.002	107.313	1.4468	108.76		108.902		0.950849	0.1422	3.92586
									Mean	3.83183
									Std. Dev.	0.28504
% Humidity of extractives free materials							Extractives and ash content
Box (g)	Cover (g)	Wet weight (g)	Box + cover + WW (g)	Dry weight (g)	%H		Extractives	60.722
17.6132	18.8172	1.0011	37.3798	0.9494	5.16432		Ash	13.0269
18.0782	18.5893	1.0009	37.6179	0.9504	5.04546
				Mean	5.10489		EAC	26.2511
Pennisetum sp. stem
% Lignin
Sample	Sample wet weight (g)	Box (g)	Filter paper (g)	Box + filter paper (g)		Bok + filter paper + sample wet weight (g)		Sample dry weight (g)	Lignin weight (g)	% Lignin
1	1.0009	102.286	1.8449	104.131		104.26		0.955359	0.1287	4.35887
2	1.0024	77.491	1.7738	79.2648		79.4001		0.956791	0.1353	4.57554
3	1.0016	107.323	1.8962	109.22		109.362		0.956027	0.1418	4.79919
									Mean	4.57786
									Std. Dev.	0.220169
% Humidity of extractives free materials							Extractives and ash content
Box (g)	Cover (g)	Wet weight (g)	Box + cover + WW (g)	Dry weight (g)	%H		Extractives	55.5311
44.3426	48.3995	1.005	93.7003	0.9582	4.65672		Ash	12.1124
44.3757	47.0331	1.0015	92.3658	0.957	4.44333
				Mean	4.55003		EAC	32.3565

## Sheet: Holocellulose
Determination of % holocellulose
																% Humudity				Dry weight
Agave durangensis bagasse
																%H = ((WW-DW)/WW)*100				SDW = SWW*(1-(%H/100))
% Holocellulose
Sample	Sample wet weight (g)	Box (g)	Filter paper (g)	Box + filter paper (g)		Bok + filter paper + sample wet weight (g)		Sample dry weight (g)	Holocellulose weight (g)	% Holocellulose
1	1.0003	102.208	1.7499	103.958		104.752		0.949659	0.7941	45.9135						Where:				Where:
2	1.0007	91.5845	1.4845	93.069		93.822		0.950039	0.753	43.5198
3	1.0003	77.4465	1.3427	78.7892		79.5735		0.949659	0.7843	45.3469						%H = Humidity percentage				SDW = Sample dry weight
4	1.0014	82.9261	1.7264	84.6525		85.4159		0.950703	0.7634	44.09						WW = Wet weight				SWW = Sample wet weight
									Media	44.7175						DW = Dry weight				% H = Humidity percentage
									Desv. Est.	1.10376
% Humidity of extractives free materials							Extractives and ash content									Extractives and ash content				% Holocellulose
Box (g)	Cover (g)	Wet weight (g)	Box + cover + WW (g)	Dry weight (g)	%H		Extractives	32.44
18.5188	18.9205	1.011	38.3986	0.9593	5.11375		Ash	12.6524								EAC = EC + AC				% Holocellulose = (HW/SDW)*EAC
11.0892	18.79	1.0037	30.8326	0.9534	5.01146
				Mean	5.0626		EAC	54.9076
																EAC = Extractives and ash content				Where:
																EC = Extractives content
																AC = Ash content				HW = Holocellulose weight
Luffa aegyptiaca fruit																				SDW = Sample dry weight
																				EAC = Extractives and ash content
% Holocellulose
Sample	Sample wet weight (g)	Box (g)	Filter paper (g)	Box + filter paper (g)		Bok + filter paper + sample wet weight (g)		Sample dry weight (g)	Holocellulose weight (g)	% Holocellulose
1	1.0058	83.1623	1.7447	84.907		85.6957		0.967616	0.7887	62.2334
2	1.007	91.5845	1.4115	92.996		93.765		0.96877	0.769	60.6066
3	1.0065	77.482	1.3688	78.8508		79.6212		0.968289	0.77035	60.7432
4	1.006	100.952	1.824	102.776		103.577		0.967808	0.80096	63.1882
									Media	61.6929
									Desv. Est.	1.23963
% Humidity of extractives free materials							Extractives and ash content
Box (g)	Cover (g)	Wet weight (g)	Box + cover + WW (g)	Dry weight (g)	%H		Extractives	18.3518
19.0071	18.7908	1.0017	38.7616	0.9637	3.79355		Ash	5.29724
17.8901	19.021	1.0002	37.8733	0.9622	3.79924
				Mean	3.7964		EAC	76.351
Pennisetum sp. leaves
% Holocellulose
Sample	Sample wet weight (g)	Box (g)	Filter paper (g)	Box + filter paper (g)		Bok + filter paper + sample wet weight (g)		Sample dry weight (g)	Holocellulose weight (g)	% Holocellulose
1	1.0133	95.8586	2.2863	98.1449		98.839		0.956239	0.6941	16.1571
2	1.0085	91.6055	1.2813	92.8868		93.6417		0.95171	0.7549	17.656
3	1.0085	90.015	1.2426	91.2576		91.963		0.95171	0.7054	16.4982
4	1.0074	92.4904	1.6007	94.0911		94.8119		0.950672	0.7208	16.8768
									Media	16.797
									Desv. Est.	0.785654
% Humidity of extractives free materials							Extractives and ash content
Box (g)	Cover (g)	Wet weight (g)	Box + cover + WW (g)	Dry weight (g)	%H		Extractives	64.1648
44.5467	46.6336	1.0042	92.1278	0.9475	5.64629		Ash	13.5761
44.2738	47.2373	1.0007	92.4556	0.9445	5.61607
				Mean	5.63118		EAC	22.2591
Pennisetum sp. plant
% Holocellulose
Sample	Sample wet weight (g)	Box (g)	Filter paper (g)	Box + filter paper (g)		Bok + filter paper + sample wet weight (g)		Sample dry weight (g)	Holocellulose weight (g)	% Holocellulose
1	1.0003	102.229	1.3188	103.548		104.294		0.949236	0.746	20.6306
2	1.001	91.5845	1.3134	92.8979		93.6796		0.9499	0.7817	21.6027
3	1.0008	77.482	1.6755	79.1575		79.905		0.94971	0.7475	20.6617
4	1.0018	84.9305	1.666	86.5965		87.3541		0.950659	0.7576	20.92
									Media	20.9538
									Desv. Est.	0.45168
% Humidity of extractives free materials							Extractives and ash content
Box (g)	Cover (g)	Wet weight (g)	Box + cover + WW (g)	Dry weight (g)	%H		Extractives	60.722
17.6132	18.8172	1.0011	37.3798	0.9494	5.16432		Ash	13.0269
18.0782	18.5893	1.0009	37.6179	0.9504	5.04546
				Mean	5.10489		EAC	26.2511
Pennisetum sp. stem
% Holocellulose
Sample	Sample wet weight (g)	Box (g)	Filter paper (g)	Box + filter paper (g)		Bok + filter paper + sample wet weight (g)		Sample dry weight (g)	Holocellulose weight (g)	% Holocellulose
1	1.0392	77.26	2.32	79.58		80.6853		0.991916	1.1053	36.0551
2	1.0125	75.072	1.8529	76.9249		78.0003		0.966431	1.0754	36.0048
3	1.0368	97.32	1.7985	99.1185		100.272		0.989625	1.1537	37.721
4	1.0268	83.2147	1.9878	85.2025		86.3166		0.98008	1.1141	36.781
									Media	36.6405
									Desv. Est.	0.976664
% Humidity of extractives free materials							Extractives and ash content
Box (g)	Cover (g)	Wet weight (g)	Box + cover + WW (g)	Dry weight (g)	%H		Extractives	55.5311
44.3426	48.3995	1.005	93.7003	0.9582	4.65672		Ash	12.1124
44.3757	47.0331	1.0015	92.3658	0.957	4.44333
				Mean	4.55003		EAC	32.3565

[truncated: 1 more sheets: Microanalysis]
